# Supplementary material for: SORAS, A ground-based 110 GHz microwave radiometer for measuring the stratospheric ozone vertical profile in Seoul
Source: Copernicus journal article supplement (doi:10.5194/amt-2024-108), 2024-09-03
Supplement: Supplementary file [file amt-2024-108-RC2-supplement.pdf]

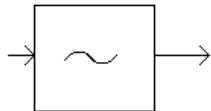

**A Filter**

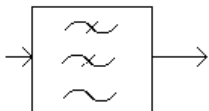

**Low Pass**

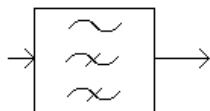

**High Pass**

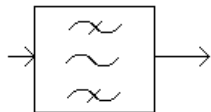

**Band Pass**

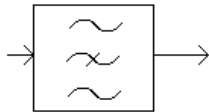

**Band Stop**

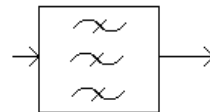

**Interference Filter**

**BLOCK DIAGRAM SYMBOLS FOR FILTERS**
